# Supplementary material for: Influenza vaccine coverage and factors associated with non-vaccination among adults at high risk for severe outcomes: An analysis of the Canadian Longitudinal Study on Aging
Source: PubMed Central journal article supplement (PMC9524702; doi:10.1371/journal.pone.0275135), 2022-09-30
Supplement: pone.0275135.s001.pdf [file pone.0275135.s001.pdf]

**Supplementary Table 1: CLSA survey questions, variables, responses options, and variable categorization**

| CLSA Survey Question and Variable Label                                                                                                                                                                  | CLSA Response Options → Variable Categorization for Analysis                                                                                                                                                                                                                                                                                                                                                                                                                                  |
|----------------------------------------------------------------------------------------------------------------------------------------------------------------------------------------------------------|-----------------------------------------------------------------------------------------------------------------------------------------------------------------------------------------------------------------------------------------------------------------------------------------------------------------------------------------------------------------------------------------------------------------------------------------------------------------------------------------------|
| <u>Have you had... Flu shot in the last 12 months</u><br>PHB_FLUV_COF1 <sup>a</sup><br>PHB_FLUV_TRF1 <sup>a</sup>                                                                                        | 1 = Yes<br>2 = No<br>9 = Refused → NA<br>-88888 = Missing → NA                                                                                                                                                                                                                                                                                                                                                                                                                                |
| <u>Participant age at FU1 (in years)</u><br>AGE_NMBR_COF1<br>AGE_NMBR_TRF1                                                                                                                               | 46-54, 55-64, 65-74, 75-84, 85-94                                                                                                                                                                                                                                                                                                                                                                                                                                                             |
| <u>Province of residence</u><br>WGHTS_PROV_COF1<br>WGHTS_PROV_TRF1                                                                                                                                       | Newfoundland, Prince Edward Island <sup>b</sup> , Nova Scotia, New Brunswick <sup>b</sup> , Quebec, Ontario, Manitoba, Saskatchewan <sup>b</sup> , Alberta, British Columbia                                                                                                                                                                                                                                                                                                                  |
| <u>What was your sex at birth?</u><br>SDC_BTHSEX_COF1<br>SDC_BTHSEX_TRF1                                                                                                                                 | 1 = Male → 1<br>2 = Female → 0<br>8 = Don't know/No answer → NA<br>9 = Refused → NA<br>-88888 = Missing → NA                                                                                                                                                                                                                                                                                                                                                                                  |
| <u>Urban/ rural classification</u><br>SDC_URBAN_RURAL_COF1<br>SDC_URBAN_RURAL_TRF1                                                                                                                       | 0 = Rural area → Rural<br>1 = Urban core → Urban<br>2 = Urban fringe → Urban<br>3 = Rural fringe in CMA/CAs → Rural<br>4 = Urban Areas out CMA/CAs → Urban<br>5 = Rural fringe out CMA/CAs → Rural<br>6 = Secondary urban core → Urban<br>9 = Link to DA → Rural<br>-88888 = Missing → NA                                                                                                                                                                                                     |
| <u>What is your best estimate of the total household income received by all household members, from all sources, before taxes and deductions, in the past 12 months?</u><br>INC_TOT_COF1<br>INC_TOT_TRF1 | 1 = Less than \$20,000<br>2 = \$20,000 or more, but less than \$50,000<br>3 = \$50,000 or more, but less than \$100,000<br>4 = \$100,000 or more, but less than \$150,000<br>5 = \$150,000 or more<br>8 = Don't know/No answer → NA<br>9 = Refused → NA<br>-88888 = Missing → NA                                                                                                                                                                                                              |
| <u>Highest Level of Education - Respondent, 4 Levels</u><br>ED_UDR04_COM<br>ED_UDR04_TRM                                                                                                                 | 1 = Less than secondary school graduation<br>2 = Secondary school graduation, no post-secondary education<br>3 = Some post-secondary education<br>4 = Post-secondary degree/diploma<br>9 = At least one required question was not answered → NA                                                                                                                                                                                                                                               |
| <u>Cultural / Racial Background</u><br>SDC_DCGT_COM<br>SDC_DCGT_TRM                                                                                                                                      | 1 = White only → White<br>2 = Black only → Non-White<br>3 = Korean only → Non-White<br>4 = Filipino only → Non-White<br>5 = Japanese only → Non-White<br>6 = Chinese only → Non-White<br>7 = South Asian only → Non-White<br>8 = Southeast Asian only → Non-White<br>9 = Arab only → Non-White<br>10 = West Asian only → Non-White<br>11 = Latin American only → Non-White<br>12 = Other racial or cultural origin (only) → Non-White<br>13 = Multiple racial or cultural origins → Non-White |

|                                                                                                                                                                                                                                                                                                                                                                                                                                                                                                                                                                                                                                                                                                                                                    |                                                                                                                                               |
|----------------------------------------------------------------------------------------------------------------------------------------------------------------------------------------------------------------------------------------------------------------------------------------------------------------------------------------------------------------------------------------------------------------------------------------------------------------------------------------------------------------------------------------------------------------------------------------------------------------------------------------------------------------------------------------------------------------------------------------------------|-----------------------------------------------------------------------------------------------------------------------------------------------|
|                                                                                                                                                                                                                                                                                                                                                                                                                                                                                                                                                                                                                                                                                                                                                    | 99 = Required question was not answered → NA                                                                                                  |
| <b>Type of CMC</b><br><u>Has a doctor ever told you that you have heart disease (including congestive heart failure or CHF)?</u><br>CCC_HEART_COF1<br>CCT_HEART_TRF1                                                                                                                                                                                                                                                                                                                                                                                                                                                                                                                                                                               | 1 = Yes<br>2 = No<br>8 = Don't know/No answer → NA<br>9 = Refused → NA<br>-88880 = Did not complete a DCS visit → NA<br>-88888 = Missing → NA |
| <b>Type of CMC</b><br><u>Has a doctor told you that you have/had any of the following: emphysema, chronic bronchitis, chronic obstructive pulmonary disease (COPD), or chronic changes in lungs due to smoking?</u><br>CCC_COPD_COF1<br>CCT_COPD_TRF1                                                                                                                                                                                                                                                                                                                                                                                                                                                                                              | 1 = Yes<br>2 = No<br>8 = Don't know/No answer → NA<br>9 = Refused → NA<br>-88880 = Did not complete a DCS visit → NA<br>-88888 = Missing → NA |
| <b>Type of CMC</b><br><u>Has a doctor ever told you that you have kidney disease or kidney failure?</u><br>CCC_KIDN_COF1<br>CCT_KIDN_TRF1                                                                                                                                                                                                                                                                                                                                                                                                                                                                                                                                                                                                          | 1 = Yes<br>2 = No<br>8 = Don't know/No answer → NA<br>9 = Refused → NA<br>-88880 = Did not complete a DCS visit → NA<br>-88888 = Missing → NA |
| <b>Type of CMC</b><br><u>Has a doctor ever told you that you have asthma?</u><br>CCC_ASTHM_COF1<br>CCT_ASTHM_TRF1                                                                                                                                                                                                                                                                                                                                                                                                                                                                                                                                                                                                                                  | 1 = Yes<br>2 = No<br>8 = Don't know/No answer → NA<br>9 = Refused → NA<br>-88880 = Did not complete a DCS visit → NA<br>-88888 = Missing → NA |
| <b>Type of CMC</b><br>Has a doctor ever told you that you have diabetes, borderline diabetes or that your blood sugar is high?<br>DIA_DIAB_COF1<br>CCT_DIAB_TRF1                                                                                                                                                                                                                                                                                                                                                                                                                                                                                                                                                                                   | 1 = Yes<br>2 = No<br>8 = Don't know/No answer → NA<br>9 = Refused → NA<br>-88888 = Missing → NA<br>-88880 = Did not complete a DCS visit → NA |
| <b>Type of CMC</b><br><u>Has a doctor ever told you that you had cancer?</u><br>CCC_CANC_COF1<br>CCT_CANC_TRF1                                                                                                                                                                                                                                                                                                                                                                                                                                                                                                                                                                                                                                     | 1 = Yes<br>2 = No<br>8 = Don't know/No answer → NA<br>9 = Refused → NA<br>-88880 = Did not complete a DCS visit → NA<br>-88888 = Missing → NA |
| <b>Type of CMC</b><br>Other CMC: <b>composite variable<sup>c</sup></b><br><br><u>Has a doctor ever told you that you have had a heart attack or myocardial infarction?;</u><br><u>Has a doctor ever told you that you have high blood pressure or hypertension?;</u> <u>Has a doctor ever told you that you have dementia or Alzheimer's disease?;</u> <u>Has a doctor ever told you that you had Parkinsonism or Parkinson's Disease?;</u> <u>Has a doctor ever told you that you have experienced a Stroke or CVA (cerebrovascular accident)?;</u> <u>Has a doctor ever told you that you have experienced a ministroke or TIA (Transient Ischemic Attack)?</u><br>CCC_AMI_COF1 and/or CCC_HBP_COF1 and/or<br>CCC_ALZH_COF1 and/or CCC_PARK_COF1 | 0 = No other CMC<br>1 = Other CMC                                                                                                             |

|                                                                                                                                                                                                                                                                                                                                                                                                                                                                                                                                                                                                                                                                                                                                                                                                                                                                                                                                                                                                                                                                                                                                                                                                                                                                                                                                                              |                                                                                                                                             |
|--------------------------------------------------------------------------------------------------------------------------------------------------------------------------------------------------------------------------------------------------------------------------------------------------------------------------------------------------------------------------------------------------------------------------------------------------------------------------------------------------------------------------------------------------------------------------------------------------------------------------------------------------------------------------------------------------------------------------------------------------------------------------------------------------------------------------------------------------------------------------------------------------------------------------------------------------------------------------------------------------------------------------------------------------------------------------------------------------------------------------------------------------------------------------------------------------------------------------------------------------------------------------------------------------------------------------------------------------------------|---------------------------------------------------------------------------------------------------------------------------------------------|
| <p>and/or CCC_CVA_COF1 and/or CCC_TIA_COF1<br/>and/or<br/>CCT_AML_TRF1 and/or CCT_HBP_TRF1 and/or<br/>CCT_ALZH_TRF1 and/or PKD_PARK_TRF1<br/>and/or CCT_CVA_TRF1 and/or<br/>CCT_TIA_TRF1</p>                                                                                                                                                                                                                                                                                                                                                                                                                                                                                                                                                                                                                                                                                                                                                                                                                                                                                                                                                                                                                                                                                                                                                                 |                                                                                                                                             |
| <p>Number of CMC: <b>calculated variable<sup>d</sup></b></p> <p>Heart disease (Y = 1, N = 0) + lung problem (Y = 1, N = 0) + kidney disease (Y = 1, N = 0) + asthma (Y = 1, N = 0) + diabetes (Y = 1, N = 0) + cancer (Y = 1, N = 0) + other CMC (Y = 1, N = 0) = <math>\sum Y</math> = Total CMC</p>                                                                                                                                                                                                                                                                                                                                                                                                                                                                                                                                                                                                                                                                                                                                                                                                                                                                                                                                                                                                                                                        | <p>0 = 0<br/>1 = 1<br/>2-7 = <math>\geq 2</math></p>                                                                                        |
| <p>Received professional care in past 12 months:<br/><b>composite variable<sup>c</sup></b></p> <p><u>During the past 12 months, did you receive short-term or long-term professional assistance at home, because of a health condition or limitation that affects your daily life, for any of the following activities?:</u></p> <p><u>Received professional personal care;</u><br/><u>Received professional medical care;</u><br/><u>Received professional managing care;</u><br/><u>Received professional assistance with meal preparation or delivery; Received professional assistance with activities;</u><br/><u>Received professional assistance with transportation;</u><br/><u>Received professional physical therapy;</u><br/><u>Received professional training and adaptation assistance;</u><br/><u>Received other professional assistance</u></p> <p>CR1_PRO_PR_COF1 and/or<br/>CR1_PRO_MD_COF1 and/or<br/>CR1_PRO_MG_COF1 and/or<br/>CR1_PRO_MH_COF1 and/or<br/>CR1_PRO_WK_COF1 and/or<br/>CR1_PRO_TR_COF1 and/or<br/>CR1_PRO_PT_COF1 and/or<br/>CR1_PRO_TA_COF1 and/or<br/>CR1_PRO_OT_COF1 and/or<br/>CR1_PRO_PR_TRF1 and/or<br/>CR1_PRO_MD_TRF1 and/or<br/>CR1_PRO_MG_TRF1 and/or<br/>CR1_PRO_MH_TRF1 and/or<br/>CR1_PRO_WK_TRF1 and/or<br/>CR1_PRO_TR_TRF1 and/or CR1_PRO_PT_TRF1<br/>and/or CR1_PRO_TA_TRF1 and/or<br/>CR1_PRO_OT_TRF1</p> | <p>0 = 0 → No professional care received for any activity listed<br/>1 = 1 → Professional care received for any activity listed</p>         |
| <p>Received non-professional care in past 12 months:<br/><b>composite variable<sup>c</sup></b></p> <p><u>Received non-professional personal care;</u><br/><u>Received non-professional medical care;</u></p>                                                                                                                                                                                                                                                                                                                                                                                                                                                                                                                                                                                                                                                                                                                                                                                                                                                                                                                                                                                                                                                                                                                                                 | <p>0 = 0 → No non-professional care received for any activity listed<br/>1 = 1 → Non-professional care received for any activity listed</p> |

|                                                                                                                                                                                                                                                                                                                                                                                                                                                                                                                                                                                                                                                                                                                                                                                                                                                                                                                                                                                  |                                                                                                                                                                       |
|----------------------------------------------------------------------------------------------------------------------------------------------------------------------------------------------------------------------------------------------------------------------------------------------------------------------------------------------------------------------------------------------------------------------------------------------------------------------------------------------------------------------------------------------------------------------------------------------------------------------------------------------------------------------------------------------------------------------------------------------------------------------------------------------------------------------------------------------------------------------------------------------------------------------------------------------------------------------------------|-----------------------------------------------------------------------------------------------------------------------------------------------------------------------|
| <p><u>Received non-professional managing care:</u><br/> <u>Received non-professional assistance with activities:</u><br/> <u>Received non-professional assistance with transportation:</u><br/> <u>Received non-professional assistance with meal preparation:</u><br/> <u>Received non-professional physical therapy:</u><br/> <u>Received non-professional training and adaptation assistance:</u><br/> <u>Received other non-professional assistance</u><br/> CR2_FAM_PR_COF1 and/or<br/> CR2_FAM_MD_COF1 and/or<br/> CR2_FAM_MG_COF1 and/or<br/> CR2_FAM_WK_COF1 and/or<br/> CR2_FAM_TR_COF1 and/or<br/> CR2_FAM_MH_COF1 and/or<br/> CR2_FAM_PT_COF1 and/or<br/> CR2_FAM_TA_COF1 and/or<br/> CR2_FAM_OT_COF1 and/or<br/> CR2_FAM_PR_TRF1 and/or<br/> CR2_FAM_MD_TRF1 and/or<br/> CR2_FAM_MG_TRF1 and/or<br/> CR2_FAM_WK_TRF1 and/or<br/> CR2_FAM_TR_TRF1 and/or<br/> CR2_FAM_MH_TRF1 and/or<br/> CR2_FAM_PT_TRF1 and/or<br/> CR2_FAM_TA_TRF1 and/or<br/> CR2_FAM_OT_TRF1</p> |                                                                                                                                                                       |
| <p><u>During the past 12 months, have you had contact with any of the following about your physical or mental health?</u><br/> <u>Has had contact with: Family Doctor</u><br/> HCU_FAMPHY_COF1<br/> HCU_FAMPHY_TRF1</p>                                                                                                                                                                                                                                                                                                                                                                                                                                                                                                                                                                                                                                                                                                                                                          | <p>1 = Yes<br/> 2 = No<br/> 8 = Don't know/No answer → NA<br/> 9 = Refused → NA<br/> -88888 = Missing → NA</p>                                                        |
| <p><u>Has had contact with: Medical specialist (such as a Cardiologist, Gynaecologist, Psychiatrist or Ophthalmologist)</u><br/> HCU_SPEC_COF1<br/> HCU_SPEC_TRF1</p>                                                                                                                                                                                                                                                                                                                                                                                                                                                                                                                                                                                                                                                                                                                                                                                                            | <p>1 = Yes<br/> 2 = No<br/> 8 = Don't know/No answer → NA<br/> 9 = Refused → NA<br/> -88888 = Missing → NA</p>                                                        |
| <p><u>Were you a patient in a hospital overnight during the past 12 months?</u><br/> HCU_HLOVRNT_COF1<br/> HCU_HLOVRNT_TRF1</p>                                                                                                                                                                                                                                                                                                                                                                                                                                                                                                                                                                                                                                                                                                                                                                                                                                                  | <p>1 = Yes<br/> 2 = No<br/> 8 = Don't know/No answer → NA<br/> 9 = Refused → NA<br/> -88888 = Missing → NA</p>                                                        |
| <p><u>In general, would you say your health is excellent, very good, good, fair, or poor?</u><br/> GEN_HLTH_COF1<br/> GEN_HLTH_TRF1</p>                                                                                                                                                                                                                                                                                                                                                                                                                                                                                                                                                                                                                                                                                                                                                                                                                                          | <p>1 = Excellent<br/> 2 = Very good<br/> 3 = Good<br/> 4 = Fair<br/> 5 = Poor<br/> 8 = Don't know/No answer → NA<br/> 9 = Refused → NA<br/> -88888 = Missing → NA</p> |
| <p><u>How many people, not including yourself, currently live in your household?: calculated variable<sup>d</sup></u><br/> SN_LIVH_NB_COF1</p>                                                                                                                                                                                                                                                                                                                                                                                                                                                                                                                                                                                                                                                                                                                                                                                                                                   | <p>0 = 0<br/> 1 = 1<br/> 2-9 = ≥2</p>                                                                                                                                 |

|                                                                                                                                                                                                                                                                                                                                                                                                                                                                                                                                 |                                                                                                                                                                                                                                                                                                      |
|---------------------------------------------------------------------------------------------------------------------------------------------------------------------------------------------------------------------------------------------------------------------------------------------------------------------------------------------------------------------------------------------------------------------------------------------------------------------------------------------------------------------------------|------------------------------------------------------------------------------------------------------------------------------------------------------------------------------------------------------------------------------------------------------------------------------------------------------|
| SN_LIVH_NB_TRF1                                                                                                                                                                                                                                                                                                                                                                                                                                                                                                                 | -88880 = Did not complete a DCS visit → NA<br>-88888 = Missing → NA                                                                                                                                                                                                                                  |
| <u>Over the past 7 days, how often did you engage in moderate sports or recreational activities such as ballroom dancing, hunting, skating, golf without a cart, softball or other similar activities?; Over the past 7 days, how often did you engage in strenuous sports or recreational activities such as jogging, swimming, snowshoeing, cycling, aerobics, skiing or other similar activities?; composite variable<sup>c</sup></u><br>PA2_MSPRT_COF1 and/or PA2_SSPRT_COF1 and/or<br>PA2_MSPRT_TRF1 and/or PA2_SSPRT_TRF1 | 1 = Never → None or Seldom<br>2 = Seldom (1 to 2 days) → None or Seldom<br>3 = Sometimes (3 to 4 days) → Sometimes or Often<br>4 = Often (5 to 7 days) → Sometimes or Often<br>8 = Don't know/No answer → NA<br>9 = Refused → NA<br>-88888 = Missing → NA                                            |
| <u>At the present time, do you smoke cigarettes daily, occasionally or not at all?</u><br>SMK_CURRCG_COF1<br>SMK_CURRCG_TRF1                                                                                                                                                                                                                                                                                                                                                                                                    | 1 = Daily (at least one cigarette every day for the past 30 days)<br>2 = Occasionally (at least one cigarette in the past 30 days, but not every day)<br>3 = Not at all (you did not smoke at all in the past 30 days)<br>8 = Don't know/No answer → NA<br>9 = Refused → NA<br>-88888 = Missing → NA |
| <u>Type of Drinker (Past 12 Months)</u><br>ALC_TTM_COF1<br>ALC_TTM_TRF1                                                                                                                                                                                                                                                                                                                                                                                                                                                         | 1 = Regular drinker (at least once a month)<br>2 = Occasional drinker<br>3 = Did not drink in the last 12 months<br>-77771 = Inconclusive due to at least one missing item → NA                                                                                                                      |

<sup>a</sup>COF1 indicates the Comprehensive cohort; TRF1 indicates the Tracking cohort

<sup>b</sup>There were no participants in the Comprehensive cohort in these provinces

<sup>c</sup>Respondents who responded “Y” or “1” to at least one of the multiple included variables were coded as “Y” or “sometimes or often” in the new composite variable

<sup>d</sup>Re-categorization of existing categories for single variable
